# Supplementary material for: Sine Systemate Chaos? A Versatile Tool for Earthworm Taxonomy: Non-Destructive Imaging of Freshly Fixed and Museum Specimens Using Micro-Computed Tomography
Source: PubMed Central journal article supplement (PMC4023944; doi:10.1371/journal.pone.0096617), 2014-05-16

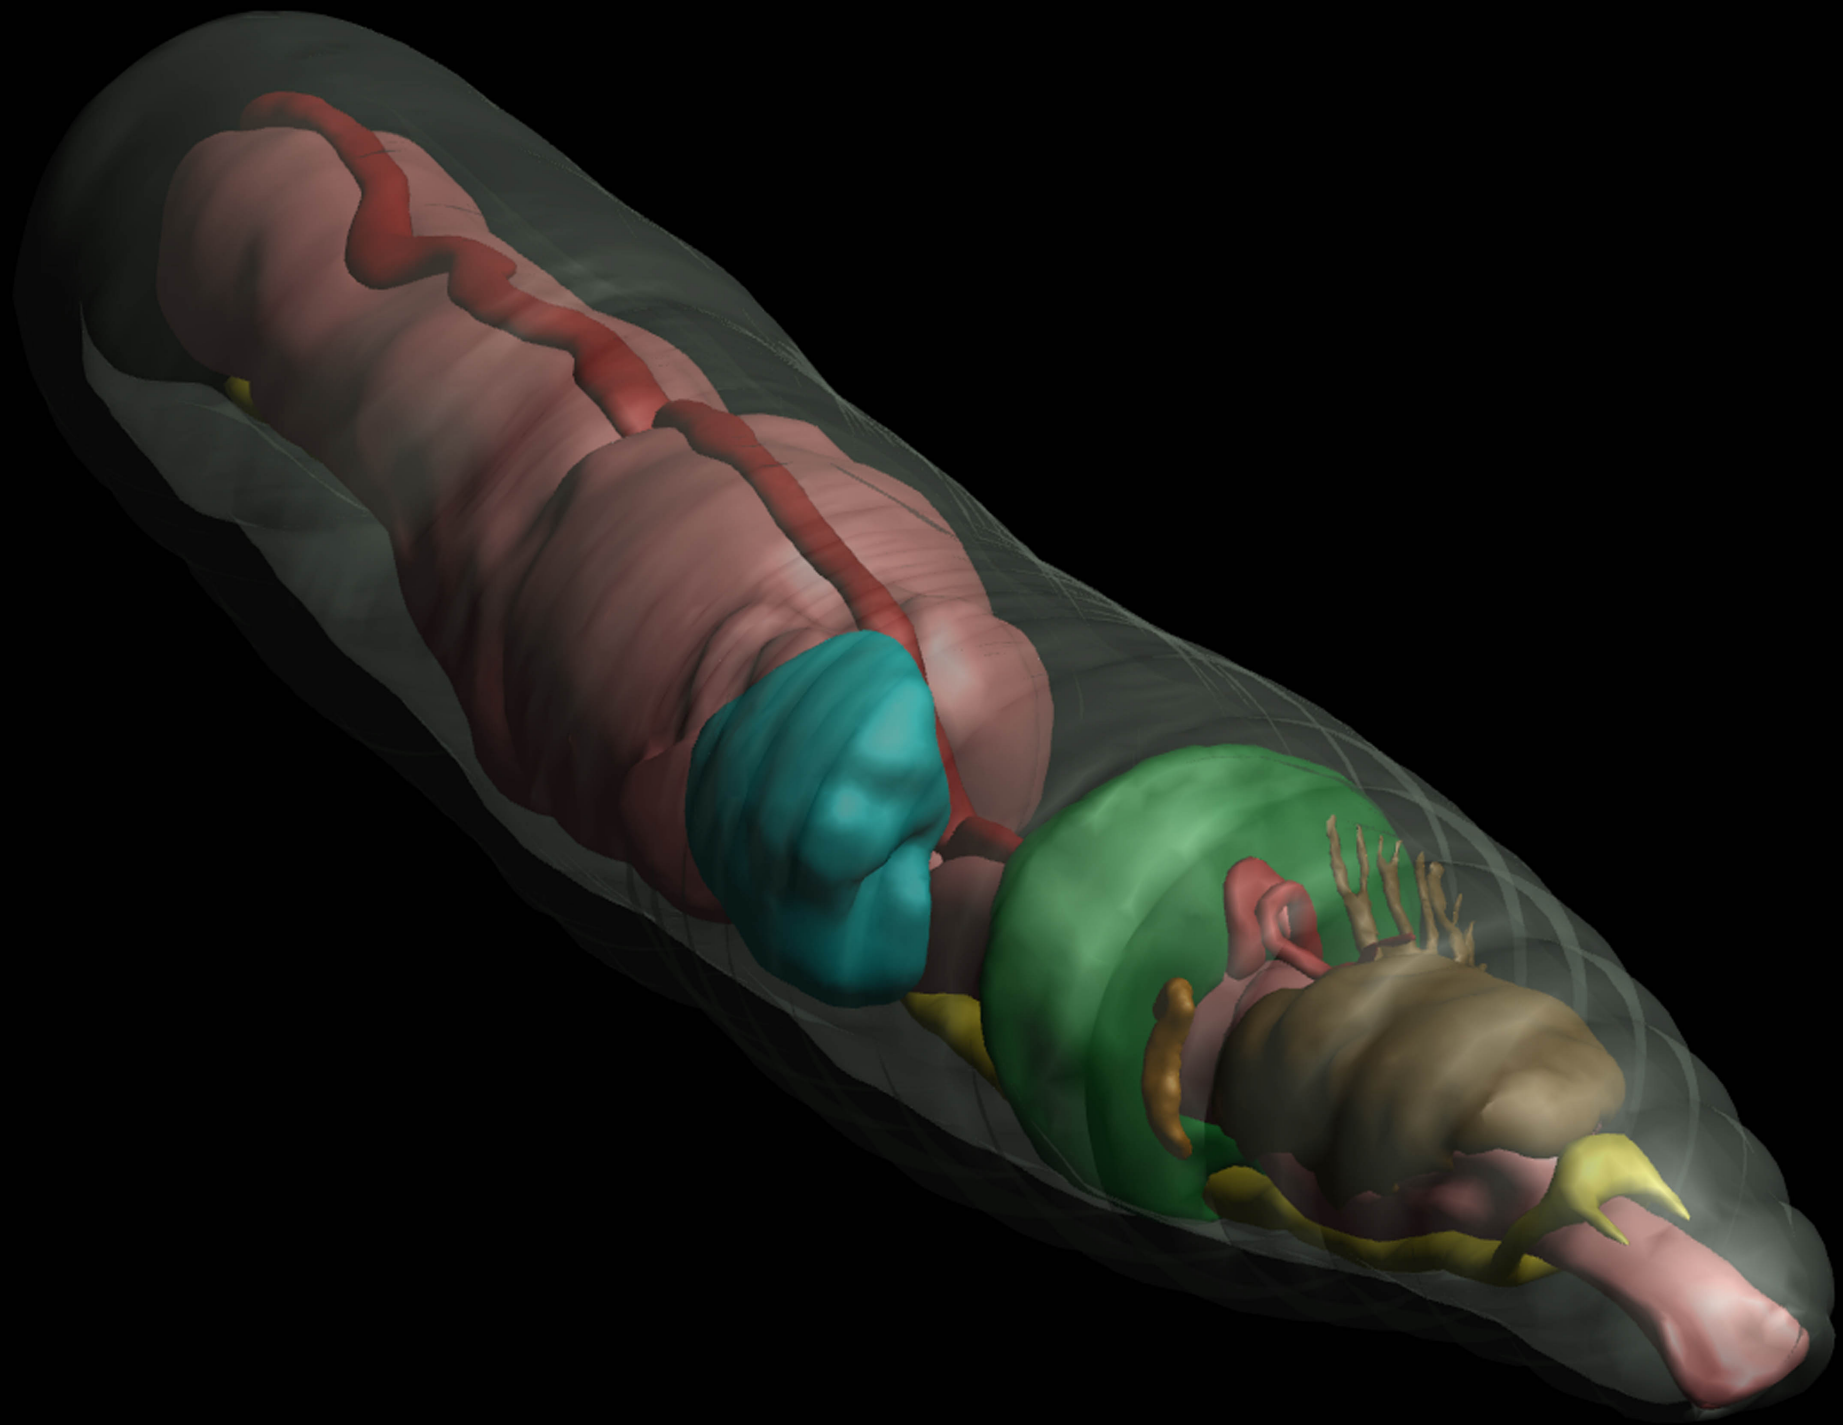

Supplement: pone.0096617.s002.pdf [file pone.0096617.s002.pdf]
